# Supplementary material for: The Diversity and Distribution of Fungi on Residential Surfaces
Source: PLoS One. 2013 Nov 1;8(11):e78866. doi: 10.1371/journal.pone.0078866 (PMC3815347; doi:10.1371/journal.pone.0078866)
Supplement: Table S1 — Summary of all the surface samples, including negatives, used in this study, with MID barcodes and sample location. (XLSX) [file pone.0078866.s006.xlsx]

## Sheet: Combined_Primer_Map.txt
SampleID	BarcodeSequence	LinkerPrimerSequence	MIDID	Season	Unit	Room	Type	PlateRun	Description
1	CATACTCTAC	CTTGGTCATTTAGAGGAAGTAA	MID-091	Summer	1	Skin	Skin	1	UV_01_Skin_1_B2
2	CGACACTATC	CTTGGTCATTTAGAGGAAGTAA	MID-092	Summer	1	Skin	Skin	1	UV_01_Skin_2_B2
3	CGAGACGCGC	CTTGGTCATTTAGAGGAAGTAA	MID-093	Summer	1	Skin	Skin	1	UV_01_Skin_3_B2
4	CGTATGCGAC	CTTGGTCATTTAGAGGAAGTAA	MID-094	Summer	1	Skin	Skin	1	UV_01_Skin_4_B2
5	CGTCGATCTC	CTTGGTCATTTAGAGGAAGTAA	MID-095	Summer	1	Skin	Skin	1	UV_01_Skin_5_B2
6	CTACGACTGC	CTTGGTCATTTAGAGGAAGTAA	MID-096	Summer	2	Skin	Skin	1	UV_02_Skin_1_B2
7	CTAGTCACTC	CTTGGTCATTTAGAGGAAGTAA	MID-097	Summer	2	Skin	Skin	1	UV_02_Skin_2_B2
8	CTCTACGCTC	CTTGGTCATTTAGAGGAAGTAA	MID-098	Summer	2	Skin	Skin	1	UV_02_Skin_3_B2
9	ACAGGAGT	CTTGGTCATTTAGAGGAAGTAA	HAM9	Summer	3	Skin	Skin	1	UV_03_Skin_1_B2
10	ACAGGTGA	CTTGGTCATTTAGAGGAAGTAA	HAM10	Summer	3	Skin	Skin	1	UV_03_Skin_2_B2
11	CGAATAGG	CTTGGTCATTTAGAGGAAGTAA	HAM11	Summer	3	Skin	Skin	1	UV_03_Skin_3_B2
12	ACGATGCT	CTTGGTCATTTAGAGGAAGTAA	HAM12	Summer	4	Skin	Skin	1	UV_04_Skin_1_B2
13	ACTGACTG	CTTGGTCATTTAGAGGAAGTAA	HAM13	Summer	4	Skin	Skin	1	UV_04_Skin_2_B2
14	AGAGGACT	CTTGGTCATTTAGAGGAAGTAA	HAM14	Summer	4	Skin	Skin	1	UV_04_Skin_3_B2
15	CATCTCGT	CTTGGTCATTTAGAGGAAGTAA	HAM15	Summer	4	Skin	Skin	1	UV_04_Skin_4_B2
16	ACAGGACA	CTTGGTCATTTAGAGGAAGTAA	HAM8	Summer	5	Skin	Skin	1	UV_05_Skin_1_B2
17	CTTCGTTG	CTTGGTCATTTAGAGGAAGTAA	HAM17	Summer	5	Skin	Skin	1	UV_05_Skin_2_B2
18	GAACCTTG	CTTGGTCATTTAGAGGAAGTAA	HAM18	Summer	5	Skin	Skin	1	UV_05_Skin_3_B2
19	GAGTTGAG	CTTGGTCATTTAGAGGAAGTAA	HAM19	Summer	5	Skin	Skin	1	UV_05_Skin_4_B2
20	GCAATAGG	CTTGGTCATTTAGAGGAAGTAA	HAM20	Summer	6	Skin	Skin	1	UV_06_Skin_1_B2
21	GCTTATGG	CTTGGTCATTTAGAGGAAGTAA	HAM21	Summer	6	Skin	Skin	1	UV_06_Skin_2_B2
22	GCTTGGAT	CTTGGTCATTTAGAGGAAGTAA	HAM22	Summer	7	Skin	Skin	1	UV_07_Skin_1_B2
23	GTTCGATG	CTTGGTCATTTAGAGGAAGTAA	HAM23	Summer	7	Skin	Skin	1	UV_07_Skin_2_B2
24	TAGCGGTT	CTTGGTCATTTAGAGGAAGTAA	HAM24	Summer	7	Skin	Skin	1	UV_07_Skin_3_B2
25	TCAGACTG	CTTGGTCATTTAGAGGAAGTAA	HAM25	Summer	7	Skin	Skin	1	UV_07_Skin_4_B2
26	TCAGCTCT	CTTGGTCATTTAGAGGAAGTAA	HAM26	Summer	7	Skin	Skin	1	UV_07_Skin_5_B2
27	TCCTAGGA	CTTGGTCATTTAGAGGAAGTAA	HAM27	Summer	8	Skin	Skin	1	UV_08_Skin_1_B2
28	TCCTGTTG	CTTGGTCATTTAGAGGAAGTAA	HAM28	Summer	8	Skin	Skin	1	UV_08_Skin_2_B2
29	TCTGGAGT	CTTGGTCATTTAGAGGAAGTAA	HAM29	Summer	9	Skin	Skin	1	UV_09_Skin_1_B2
30	TGGTCTAG	CTTGGTCATTTAGAGGAAGTAA	HAM30	Summer	9	Skin	Skin	1	UV_09_Skin_2_B2
31	TGTGACTG	CTTGGTCATTTAGAGGAAGTAA	HAM31	Summer	9	Skin	Skin	1	UV_09_Skin_3_B2
32	ACTGCTCT	CTTGGTCATTTAGAGGAAGTAA	HAM32	Summer	10	Skin	Skin	1	UV_10_Skin_1_B2
33	ATAGAGTACT	CTTGGTCATTTAGAGGAAGTAA	MID-033	Summer	10	Skin	Skin	1	UV_10_Skin_2_B2
34	CACGCTACGT	CTTGGTCATTTAGAGGAAGTAA	MID-034	Summer	11	Skin	Skin	1	UV_11_Skin_1_B2
35	ACTGGACT	CTTGGTCATTTAGAGGAAGTAA	HAM33	Negative	Negative	Negative	Negative	1	dust_1_neg_2B2
36	ACTGGTGT	CTTGGTCATTTAGAGGAAGTAA	HAM34	Negative	Negative	Negative	Negative	1	dust_2_neg_2B2
37	ACTGTCAG	CTTGGTCATTTAGAGGAAGTAA	HAM35	Negative	Negative	Negative	Negative	1	skin_3_neg_2B2
38	ACTGTCTC	CTTGGTCATTTAGAGGAAGTAA	HAM36	Negative	Negative	Negative	Negative	1	PCR_negative_2B2
39	ACAGACTC	CTTGGTCATTTAGAGGAAGTAA	HAM2	Negative	Negative	Negative	Negative	1	dust_1_neg_B2
40	ACAGAGAC	CTTGGTCATTTAGAGGAAGTAA	HAM3	Negative	Negative	Negative	Negative	1	dust_2_neg_B2
41	ACAGCACT	CTTGGTCATTTAGAGGAAGTAA	HAM5	Negative	Negative	Negative	Negative	1	skin_3_neg_B2
42	ACAGCAGA	CTTGGTCATTTAGAGGAAGTAA	HAM6	Negative	Negative	Negative	Negative	1	PCR_negative_B2
43	ACGAGTGCGT	CTTGGTCATTTAGAGGAAGTAA	MID-001	Summer	1	Bathroom	Drain	3	01_bath_drain
44	ACGCTCGACA	CTTGGTCATTTAGAGGAAGTAA	MID-002	Summer	1	Bathroom	Drain	3	01_bath_sink
45	AGACGCACTC	CTTGGTCATTTAGAGGAAGTAA	MID-003	Summer	1	Bathroom	Tiles	3	01_bath_tiles
46	AGCACTGTAG	CTTGGTCATTTAGAGGAAGTAA	MID-004	Summer	1	Bedroom	Sill	3	01_bedr_sill
47	ATCAGACACG	CTTGGTCATTTAGAGGAAGTAA	MID-005	Summer	1	Kitchen	Sill	3	01_K_sill
48	ATATCGCGAG	CTTGGTCATTTAGAGGAAGTAA	MID-006	Summer	1	Kitchen	Drain	3	01_K_sink
49	CGTGTCTCTA	CTTGGTCATTTAGAGGAAGTAA	MID-007	Winter	3	Bathroom	Drain	3	03_bath_sink_W
50	CTCGCGTGTC	CTTGGTCATTTAGAGGAAGTAA	MID-008	Summer	1	LR	Sill	3	01_LR_sill
51	TCTCTATGCG	CTTGGTCATTTAGAGGAAGTAA	MID-010	Summer	2	Bathroom	Drain	3	02_bath_drain
52	CATAGTAGTG	CTTGGTCATTTAGAGGAAGTAA	MID-013	Summer	2	Bathroom	Tiles	3	02_bath_tiles
53	CGAGAGATAC	CTTGGTCATTTAGAGGAAGTAA	MID-014	Summer	2	Bedroom	Sill	3	02_bedr_sill
54	ATACGACGTA	CTTGGTCATTTAGAGGAAGTAA	MID-015	Winter	3	Bathroom	Tiles	3	03_bath_tiles_W
55	TCACGTACTA	CTTGGTCATTTAGAGGAAGTAA	MID-016	Summer	2	LR	Sill	3	02_LR_sill
56	TCTACGTAGC	CTTGGTCATTTAGAGGAAGTAA	MID-018	Summer	3	Bathroom	Drain	3	03_bath_drain
57	TGTACTACTC	CTTGGTCATTTAGAGGAAGTAA	MID-019	Summer	3	Bathroom	Drain	3	03_bath_sink
58	ACGACTACAG	CTTGGTCATTTAGAGGAAGTAA	MID-020	Summer	3	Bathroom	Tiles	3	03_bath_tiles
59	CGTAGACTAG	CTTGGTCATTTAGAGGAAGTAA	MID-021	Summer	3	Bedroom	Sill	3	03_bedr_sill
60	TACGAGTATG	CTTGGTCATTTAGAGGAAGTAA	MID-022	Summer	3	Kitchen	Sill	3	03_K_sill
61	TAGAGACGAG	CTTGGTCATTTAGAGGAAGTAA	MID-024	Summer	3	Kitchen	Stove	3	03_K_stove
62	TCGTCGCTCG	CTTGGTCATTTAGAGGAAGTAA	MID-025	Summer	3	LR	Sill	3	03_LR_sill
63	ACATACGCGT	CTTGGTCATTTAGAGGAAGTAA	MID-026	Summer	4	Bathroom	Drain	3	04_bath_drain
64	ACGCGAGTAT	CTTGGTCATTTAGAGGAAGTAA	MID-027	Summer	4	Bathroom	Drain	3	04_bath_sink
65	ACTACTATGT	CTTGGTCATTTAGAGGAAGTAA	MID-028	Summer	4	Bathroom	Tiles	3	04_bath_tiles
66	ACTGTACAGT	CTTGGTCATTTAGAGGAAGTAA	MID-029	Summer	4	Bedroom	Sill	3	04_bedr_sill
67	AGACTATACT	CTTGGTCATTTAGAGGAAGTAA	MID-030	Summer	4	Kitchen	Drain	3	04_K_sink
68	AGCGTCGTCT	CTTGGTCATTTAGAGGAAGTAA	MID-031	Winter	3	Kitchen	Sill	3	03_K_sill_W
69	AGTACGCTAT	CTTGGTCATTTAGAGGAAGTAA	MID-032	Summer	4	LR	Sill	3	04_LR_sill
70	ATAGAGTACT	CTTGGTCATTTAGAGGAAGTAA	MID-033	Summer	5	Bathroom	Drain	3	05_bath_drain
71	CACGCTACGT	CTTGGTCATTTAGAGGAAGTAA	MID-034	Summer	5	Bathroom	Sill	3	05_bath_sill
72	CAGTAGACGT	CTTGGTCATTTAGAGGAAGTAA	MID-035	Summer	5	Bathroom	Drain	3	05_bath_sink
73	TACACACACT	CTTGGTCATTTAGAGGAAGTAA	MID-037	Summer	5	Bedroom	Sill	3	05_bedr_sill
74	TACACGTGAT	CTTGGTCATTTAGAGGAAGTAA	MID-038	Summer	5	Kitchen	Sill	3	05_K_sill
75	TACAGATCGT	CTTGGTCATTTAGAGGAAGTAA	MID-039	Summer	5	Kitchen	Drain	3	05_K_sink
76	TACGCTGTCT	CTTGGTCATTTAGAGGAAGTAA	MID-040	Winter	3	Kitchen	Drain	3	03_K_sink_W
77	TAGTGTAGAT	CTTGGTCATTTAGAGGAAGTAA	MID-041	Summer	5	LR	Sill	3	05_LR_sill
78	TCGATCACGT	CTTGGTCATTTAGAGGAAGTAA	MID-042	Summer	6	Bathroom	Drain	3	06_bath_drain
79	TCGCACTAGT	CTTGGTCATTTAGAGGAAGTAA	MID-043	Summer	6	Bathroom	Drain	3	06_bath_sink
80	TCTAGCGACT	CTTGGTCATTTAGAGGAAGTAA	MID-044	Summer	6	Bathroom	Tiles	3	06_bath_tiles
81	TCTATACTAT	CTTGGTCATTTAGAGGAAGTAA	MID-045	Summer	6	Bedroom	Sill	3	06_bedr_sill
82	TGACGTATGT	CTTGGTCATTTAGAGGAAGTAA	MID-046	Summer	6	Kitchen	Drain	3	06_K_sink
83	TGTGAGTAGT	CTTGGTCATTTAGAGGAAGTAA	MID-047	Winter	3	LR	Sill	3	03_LR_sill_W
84	ACAGTATATA	CTTGGTCATTTAGAGGAAGTAA	MID-048	Summer	6	LR	Sill	3	06_LR_sill
85	ACGCGATCGA	CTTGGTCATTTAGAGGAAGTAA	MID-049	Summer	7	Bathroom	Drain	3	07_bath_drain
86	ACTAGCAGTA	CTTGGTCATTTAGAGGAAGTAA	MID-050	Summer	7	Bathroom	Tiles	3	07_bath_tiles
87	AGCTCACGTA	CTTGGTCATTTAGAGGAAGTAA	MID-051	Summer	7	Bathroom	Drain	3	07_bath/K_sink
88	AGTATACATA	CTTGGTCATTTAGAGGAAGTAA	MID-052	Summer	7	Bedroom	Sill	3	07_bedr_sill
89	AGTCGAGAGA	CTTGGTCATTTAGAGGAAGTAA	MID-053	Summer	7	Kitchen	Sill	3	07_K_sill
90	CGATCGTATA	CTTGGTCATTTAGAGGAAGTAA	MID-055	Summer	7	Kitchen	Stove	3	07_K_stove
91	CGCAGTACGA	CTTGGTCATTTAGAGGAAGTAA	MID-056	Summer	7	Kitchen	Sill	3	07_K/balc_door
92	CGCGTATACA	CTTGGTCATTTAGAGGAAGTAA	MID-057	Summer	7	LR	Sill	3	07_LR_sill
93	CGTACAGTCA	CTTGGTCATTTAGAGGAAGTAA	MID-058	Summer	8	Bathroom	Drain	3	08_bath_drain
94	CGTACTCAGA	CTTGGTCATTTAGAGGAAGTAA	MID-059	Summer	8	Bathroom	Drain	3	08_bath_sink
95	CTACGCTCTA	CTTGGTCATTTAGAGGAAGTAA	MID-060	Summer	8	Bathroom	Tiles	3	08_bath_tiles
96	CTATAGCGTA	CTTGGTCATTTAGAGGAAGTAA	MID-061	Summer	8	Bedroom	Sill	3	08_bedr_sill
97	TACGTCATCA	CTTGGTCATTTAGAGGAAGTAA	MID-062	Winter	3	Bedroom	Sill	3	03_bath_sill_W
98	TAGTCGCATA	CTTGGTCATTTAGAGGAAGTAA	MID-063	Summer	8	Kitchen	Stove	3	08_K_stove
99	TATATATACA	CTTGGTCATTTAGAGGAAGTAA	MID-064	Summer	8	LR	Sill	3	08_LR_sill
100	TATGCTAGTA	CTTGGTCATTTAGAGGAAGTAA	MID-065	Summer	9	Bathroom	Drain	3	09_bath_drain
101	TCACGCGAGA	CTTGGTCATTTAGAGGAAGTAA	MID-066	Summer	9	Bathroom	Drain	3	09_bath_sink
102	TCGATAGTGA	CTTGGTCATTTAGAGGAAGTAA	MID-067	Negative	Negative	Negative	Negative	3	no_DNA_W
103	TCGCTGCGTA	CTTGGTCATTTAGAGGAAGTAA	MID-068	Summer	9	Bedroom	Sill	3	09_bedr_sill
104	TCTGACGTCA	CTTGGTCATTTAGAGGAAGTAA	MID-069	Summer	9	Kitchen	Sill	3	09_K_sill
105	TGAGTCAGTA	CTTGGTCATTTAGAGGAAGTAA	MID-070	Summer	9	Kitchen	Drain	3	09_K_sink
106	TGTAGTGTGA	CTTGGTCATTTAGAGGAAGTAA	MID-071	Summer	9	Kitchen	Stove	3	09_K_stove
107	TGTCACACGA	CTTGGTCATTTAGAGGAAGTAA	MID-072	Summer	9	LR	Sill	3	09_LR_sill
108	TGTCGTCGCA	CTTGGTCATTTAGAGGAAGTAA	MID-073	Summer	10	Bathroom	Drain	3	10_bath_drain
109	ACACATACGC	CTTGGTCATTTAGAGGAAGTAA	MID-074	Summer	10	Bathroom	Drain	3	10_bath_sink
110	ACAGTCGTGC	CTTGGTCATTTAGAGGAAGTAA	MID-075	Summer	10	Bathroom	Tiles	3	10_bath_tiles
111	ACATGACGAC	CTTGGTCATTTAGAGGAAGTAA	MID-076	Summer	10	Bedroom	Sill	3	10_bedr_sill
112	ACGACAGCTC	CTTGGTCATTTAGAGGAAGTAA	MID-077	Summer	10	Kitchen	Sill	3	10_K_sill
113	ACGTCTCATC	CTTGGTCATTTAGAGGAAGTAA	MID-078	Winter	3	Skin	Skin	3	03_skin-1_W
114	ACTCATCTAC	CTTGGTCATTTAGAGGAAGTAA	MID-079	Summer	10	LR	Sill	3	10_LR_sill
115	ACTCGCGCAC	CTTGGTCATTTAGAGGAAGTAA	MID-080	Summer	11	Bathroom	Drain	3	11_bath_drain
116	AGAGCGTCAC	CTTGGTCATTTAGAGGAAGTAA	MID-081	Summer	11	Bathroom	Drain	3	11_bath_sink
117	AGCGACTAGC	CTTGGTCATTTAGAGGAAGTAA	MID-082	Summer	11	Bathroom	Tiles	3	11_bath_tiles
118	AGTAGTGATC	CTTGGTCATTTAGAGGAAGTAA	MID-083	Summer	11	Bedroom	Sill	3	11_bedr_sill
119	AGTGACACAC	CTTGGTCATTTAGAGGAAGTAA	MID-084	Winter	3	Skin	Skin	3	03_skin_2_W
120	AGTGTATGTC	CTTGGTCATTTAGAGGAAGTAA	MID-085	Summer	11	Kitchen	Stove	3	11_K_stove
121	ATAGATAGAC	CTTGGTCATTTAGAGGAAGTAA	MID-086	Summer	11	LR	Sill	3	11_LR_sill
122	ATATAGTCGC	CTTGGTCATTTAGAGGAAGTAA	MID-087	Negative	Negative	Negative	Negative	3	neg_7/6/11_18
123	ATCTACTGAC	CTTGGTCATTTAGAGGAAGTAA	MID-088	Negative	Negative	Negative	Negative	3	neg_7/3/11_25
124	CACGTAGATC	CTTGGTCATTTAGAGGAAGTAA	MID-089	Winter	2	Bathroom	Drain	3	02_bath_drain_W
125	CACGTGTCGC	CTTGGTCATTTAGAGGAAGTAA	MID-090	Winter	2	Bathroom	Drain	3	02_bath_sink_W
126	CATACTCTAC	CTTGGTCATTTAGAGGAAGTAA	MID-091	Winter	2	Bathroom	Drain	3	02_bath_tiles_W
127	CGACACTATC	CTTGGTCATTTAGAGGAAGTAA	MID-092	Winter	2	Bedroom	Sill	3	02_bedr_sill__W
128	CGAGACGCGC	CTTGGTCATTTAGAGGAAGTAA	MID-093	Winter	2	LR	Sill	3	02_LR_sill_W
129	CGTATGCGAC	CTTGGTCATTTAGAGGAAGTAA	MID-094	Winter	2	Kitchen	Drain	3	02_K_sink_W
130	CGTCGATCTC	CTTGGTCATTTAGAGGAAGTAA	MID-095	Winter	2	Skin	Skin	3	02_skin-1_W
131	CTACGACTGC	CTTGGTCATTTAGAGGAAGTAA	MID-096	Winter	2	Skin	Skin	3	02_skin-2_W
132	CTAGTCACTC	CTTGGTCATTTAGAGGAAGTAA	MID-097	Winter	2	Skin	Skin	3	02_skin-3_W
133	CTCTACGCTC	CTTGGTCATTTAGAGGAAGTAA	MID-098	Winter	3	Bathroom	Drain	3	03_bath_drain_W
134	ACGAGTGCGT	CTTGGTCATTTAGAGGAAGTAA	MID-001	Winter	4	Bathroom	Drain	4	04_Bathtub_drain
135	ACGCTCGACA	CTTGGTCATTTAGAGGAAGTAA	MID-002	Winter	4	Bathroom	Sink	4	04_Bathroom_sink
136	AGACGCACTC	CTTGGTCATTTAGAGGAAGTAA	MID-003	Winter	4	Bathroom	Tiles	4	04_Bathroom_tiles
137	AGCACTGTAG	CTTGGTCATTTAGAGGAAGTAA	MID-004	Winter	4	Bedroom	Sill	4	04_Bedroom_sill
138	ATCAGACACG	CTTGGTCATTTAGAGGAAGTAA	MID-005	Winter	4	Kitchen	Drain	4	04_Kitchen_sink
139	ATATCGCGAG	CTTGGTCATTTAGAGGAAGTAA	MID-006	Negative	Negative	Negative	Negative	4	no_DNA-PCR
140	CGTGTCTCTA	CTTGGTCATTTAGAGGAAGTAA	MID-007	Winter	4	Skin	Skin	4	04_Skin-1
141	CTCGCGTGTC	CTTGGTCATTTAGAGGAAGTAA	MID-008	Winter	4	Skin	Skin	4	04_Skin-2
142	TGATACGTCT	CTTGGTCATTTAGAGGAAGTAA	MID-011	Winter	4	Skin	Skin	4	04_Skin-4
143	CATAGTAGTG	CTTGGTCATTTAGAGGAAGTAA	MID-013	Winter	5	Bathroom	Drain	4	05_Bathtub_drain
144	CGAGAGATAC	CTTGGTCATTTAGAGGAAGTAA	MID-014	Winter	5	Bathroom	Sill	4	05_Bathroom_sill
145	ATACGACGTA	CTTGGTCATTTAGAGGAAGTAA	MID-015	Winter	5	Bathroom	Drain	4	05_Bathroom_sink
146	TCACGTACTA	CTTGGTCATTTAGAGGAAGTAA	MID-016	Winter	4	LR	Sill	4	04_LR_sill
147	TCTACGTAGC	CTTGGTCATTTAGAGGAAGTAA	MID-018	Winter	5	Kitchen	Sill	4	05_Kitchen_sill
148	ACGACTACAG	CTTGGTCATTTAGAGGAAGTAA	MID-020	Winter	5	LR	Sill	4	05_LR_sill
149	TAGAGACGAG	CTTGGTCATTTAGAGGAAGTAA	MID-024	Negative	Negative	Negative	Negative	4	no_DNA_extr_11_5-5
150	TCGTCGCTCG	CTTGGTCATTTAGAGGAAGTAA	MID-025	Winter	7	Bathroom	Drain	4	07_Bathtub_drain
151	ACATACGCGT	CTTGGTCATTTAGAGGAAGTAA	MID-026	Winter	7	Bathroom	Drain	4	07_Bathroom_sink
152	ACGCGAGTAT	CTTGGTCATTTAGAGGAAGTAA	MID-027	Winter	7	Bathroom	Tiles	4	07_Bathroom_tiles
153	ACTACTATGT	CTTGGTCATTTAGAGGAAGTAA	MID-028	Winter	7	Bedroom	Sill	4	07_Bedroom_sill
154	ACTGTACAGT	CTTGGTCATTTAGAGGAAGTAA	MID-029	Winter	7	Kitchen	Sill	4	07_Kitchen_sill
155	AGACTATACT	CTTGGTCATTTAGAGGAAGTAA	MID-030	Winter	7	Kitchen	Drain	4	07_Kitchen_sink
156	AGCGTCGTCT	CTTGGTCATTTAGAGGAAGTAA	MID-031	Winter	7	LR	Sill	4	07_LR_sill
157	AGTACGCTAT	CTTGGTCATTTAGAGGAAGTAA	MID-032	Winter	7	Skin	Skin	4	07_Skin-1
158	ATAGAGTACT	CTTGGTCATTTAGAGGAAGTAA	MID-033	Winter	7	Skin	Skin	4	07_Skin-2
159	CACGCTACGT	CTTGGTCATTTAGAGGAAGTAA	MID-034	Winter	7	Skin	Skin	4	07_Skin-3
160	CAGTAGACGT	CTTGGTCATTTAGAGGAAGTAA	MID-035	Winter	7	Skin	Skin	4	07_Skin-4
161	CGACGTGACT	CTTGGTCATTTAGAGGAAGTAA	MID-036	Winter	7	Skin	Skin	4	07_Skin-5
162	TACACGTGAT	CTTGGTCATTTAGAGGAAGTAA	MID-038	Winter	8	Bathroom	Drain	4	08_Bathroom_sink
163	TACGCTGTCT	CTTGGTCATTTAGAGGAAGTAA	MID-040	Winter	8	Bedroom	Sill	4	08_Bedroom_sill
164	TAGTGTAGAT	CTTGGTCATTTAGAGGAAGTAA	MID-041	Winter	8	Kitchen	Drain	4	08_Kitchen_sink
165	TCGATCACGT	CTTGGTCATTTAGAGGAAGTAA	MID-042	Winter	8	LR	Sill	4	08_LR_sill
166	TCGCACTAGT	CTTGGTCATTTAGAGGAAGTAA	MID-043	Winter	8	Skin	Skin	4	08_Skin-1
167	TCTAGCGACT	CTTGGTCATTTAGAGGAAGTAA	MID-044	Winter	8	Skin	Skin	4	08_Skin-2
168	TGACGTATGT	CTTGGTCATTTAGAGGAAGTAA	MID-046	Winter	10	Bathroom	Drain	4	10_Bathroom_sink
169	ACAGTATATA	CTTGGTCATTTAGAGGAAGTAA	MID-048	Winter	10	Bedroom	Sill	4	10_Bedroom_sill
170	AGTGCTACGA	CTTGGTCATTTAGAGGAAGTAA	MID-054	Winter	11	Bathroom	Drain	4	11_Bathroom_sink
171	CGCAGTACGA	CTTGGTCATTTAGAGGAAGTAA	MID-056	Winter	11	Bedroom	Sill	4	11_Bedroom_sill
172	CGTACAGTCA	CTTGGTCATTTAGAGGAAGTAA	MID-058	Winter	11	LR	Sill	4	11_LR_sill
173	CGTACTCAGA	CTTGGTCATTTAGAGGAAGTAA	MID-059	Winter	11	Skin	Skin	4	11_Skin-1
174	CTACGCTCTA	CTTGGTCATTTAGAGGAAGTAA	MID-060	Negative	Negative	Negative	Negative	4	no_DNA_extr_8_3-26
175	CTATAGCGTA	CTTGGTCATTTAGAGGAAGTAA	MID-061	Negative	Negative	Negative	Negative	4	no_DNA_extr_9_4-12
176	TACGTCATCA	CTTGGTCATTTAGAGGAAGTAA	MID-062	Negative	Negative	Negative	Negative	4	no_DNA_extr_14_5-4
